# Supplementary material
Source: publisher figshare collection journal article supplement (https://sage.figshare.com/ndownloader/files/14924198)
Supplement: Supplementary file 1 [file 14924198]

**Supplement Table S2.** Reasons for discontinuation of secukinumab treatment.

| Reasons for secukinumab discontinuation, n (%) | Reimbursed | Non-reimbursed | All patients |
|------------------------------------------------|------------|----------------|--------------|
| Financial reasons and almost clear of lesions  | 0 (%)      | 5 (20.8%)      | 5 (4.2%)     |
| Secondary loss of efficacy                     | 5 (5.3%)   | 0 (0%)         | 5 (4.2%)     |
| Patient decision                               | 4 (4.3%)   | 0 (0%)         | 4 (3.3%)     |
| Financial reasons                              | 0 (0%)     | 3 (12.5%)      | 3 (2.5%)     |
| Adverse events                                 | 1 (1.1%)   | 3 (12.5%)      | 4 (3.3%)     |
| Clinical trial participation                   | 0 (0%)     | 2 (8.3%)       | 2 (1.7%)     |
| Unexpected death                               | 1 (1.1%)   | 0 (0 %)        | 1 (0.8%)     |
| Newly diagnosed with malignancy                | 0 (0%)     | 1 (4.1 %)      | 1 (0.8%)     |
| Primary lack of efficacy                       | 1 (1.1%)   | 0 (0%)         | 1 (0.8%)     |
